# Supplementary material for: Depletion-induced size fractionation of nanorod dispersions
Source: Royal Society of Chemistry journal article supplement (doi:10.1039/c3sm50825k), 2013-01-01
Supplement: c3sm50825k.pdf [file c3sm50825k.pdf]

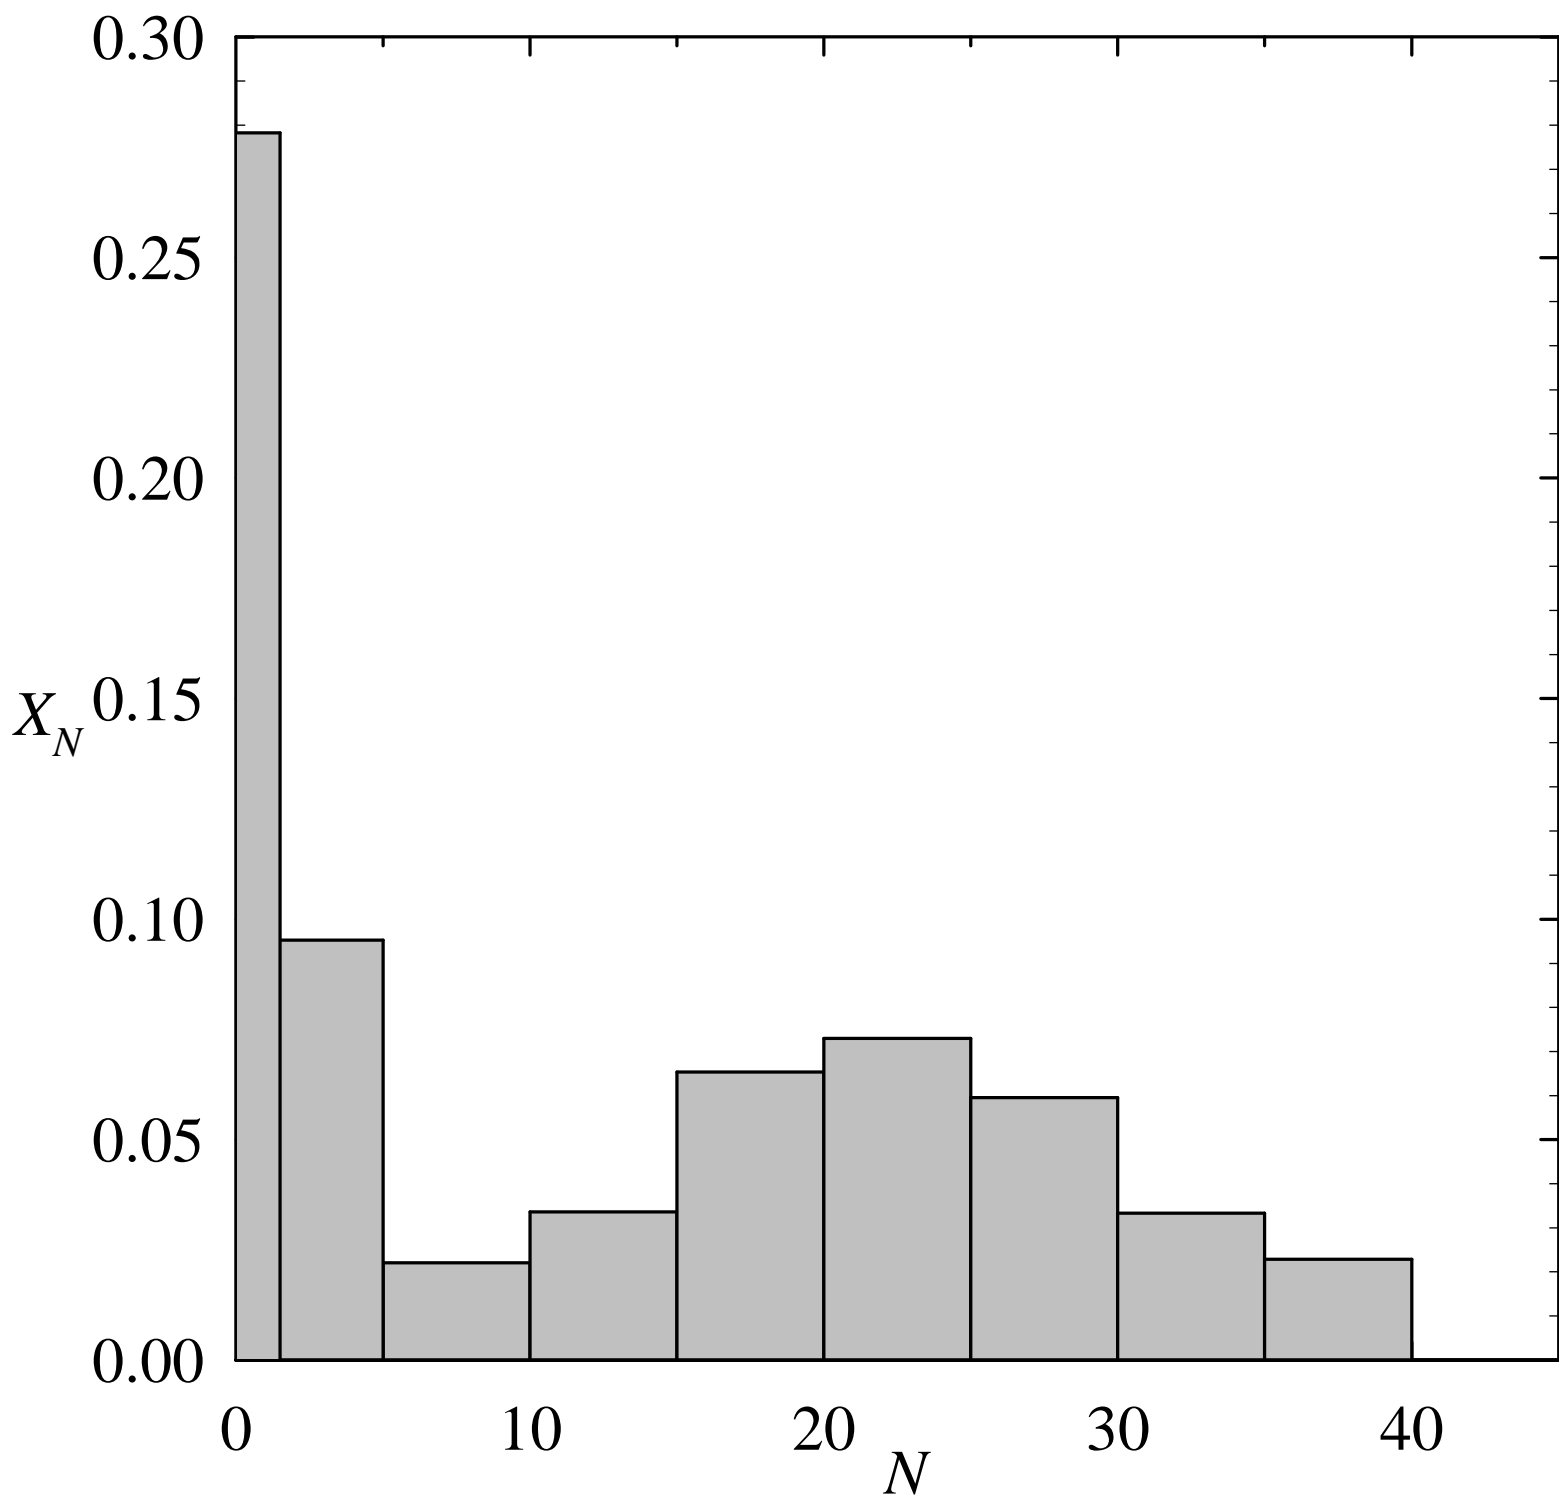

Figure S1. Cluster size distribution of nanorods with  $L=15$  at  $\varphi_R=0.01$  and  $\varphi_P=0.2$ . A cluster of size  $N$  contains  $N$  nanorods.  $X_N$  depicts the average nanorod fraction of clusters of size  $N$  observed in the system and it can be calculated by  $X_N = (\langle n_N \rangle \cdot N) / N_t$ , where  $\langle n_N \rangle$  and  $N_t$  denote the mean number of the cluster of size  $N$  and the total number of nanorods, respectively.
